# Supplementary material
Source: Springer Nature journal article supplement (https://www.springermedizin.de/resource/supplementary/12889_2002_41_MOESM7_ESM.pdf/9500166)

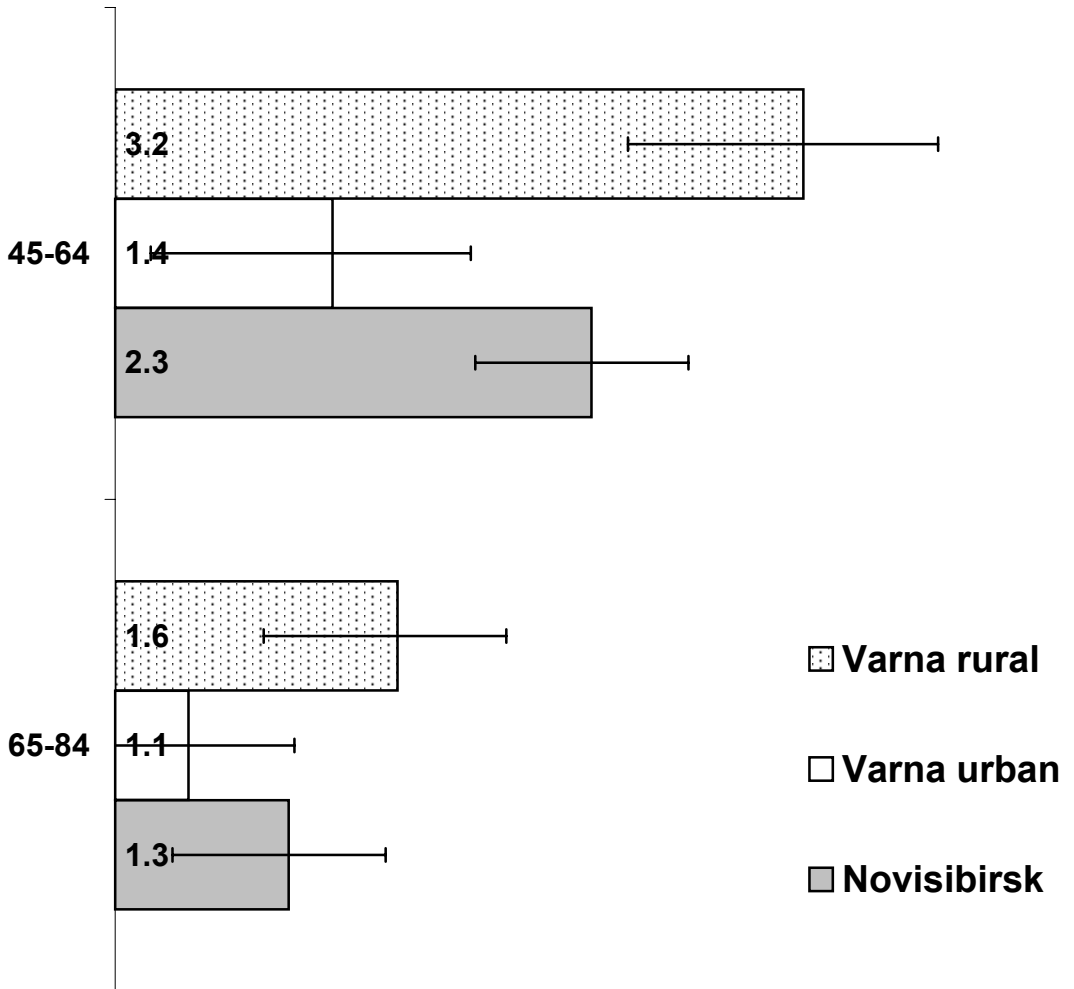

**Rate ratios**

Supplement: MOESM7 [file 9500166]
